# Supplementary material for: Distributing tasks via multiple input pathways increases cellular survival in stress
Source: eLife journal article supplement (doi:10.7554/elife.21415), 2017-05-17
Supplement: supp [file elife_poa_e21415_Figure_2_Figure_Supplement1.pdf › elife_poa_e21415_Figure_2_Figure_Supplement1.pdf]

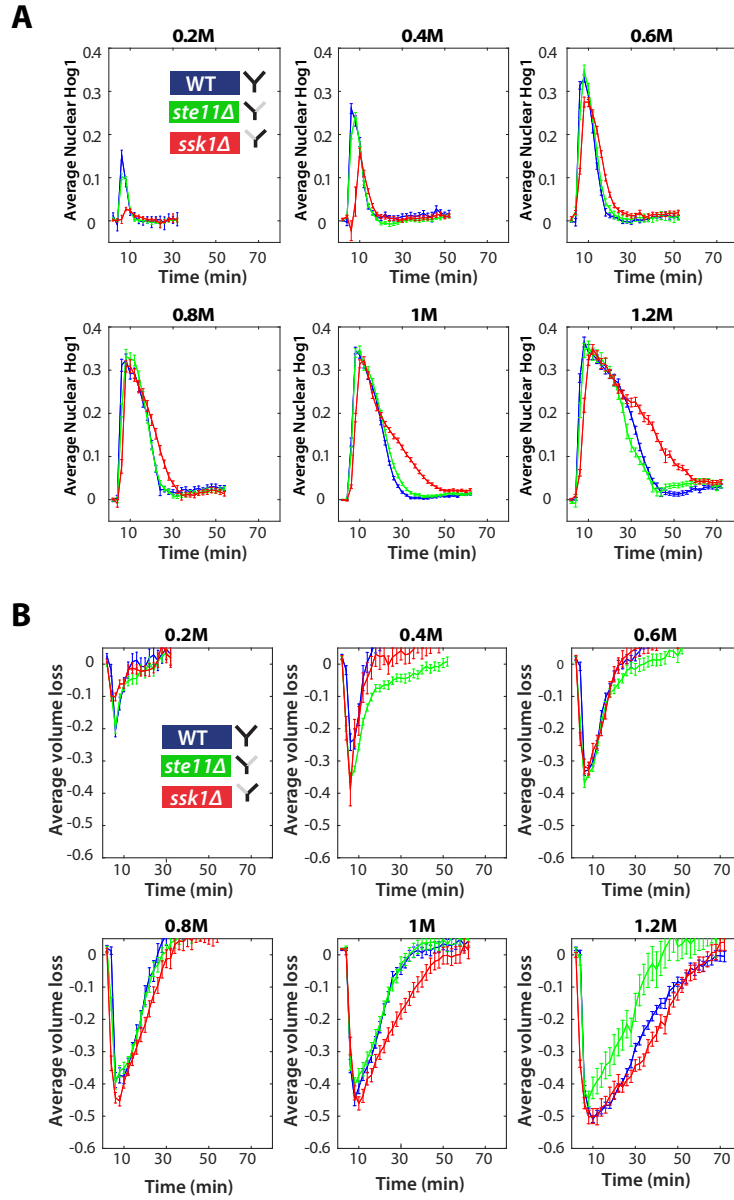

**Figure 2—supplement 1: The Hog1 and volume response for wild-type and mutants in steps.** **A** Step data used in Fig. 2C with the sorbitol concentrations given above each panel. Average and SEM error bars are shown. Numbers of cells are listed in order of wild-type, *ste11Δ*, *ssk1Δ* for each experiment (n=78, 112, 94 for 0.2M; n=116, 140, 87 for 0.4M; n=105, 123, 113 for 0.6M ; n=82, 81, 87 for 0.8M; n=192, 148, 125 for 1.0M; n=133, 89, 94 for 1.2M) **B** Average volume traces for the experiments shown in A. Error bars are SEM.
