# Supplementary material for: Distributing tasks via multiple input pathways increases cellular survival in stress
Source: eLife journal article supplement (doi:10.7554/elife.21415), 2017-05-17
Supplement: supp [file elife_poa_e21415_Figure_2_Supplement_2.pdf › elife_poa_e21415_Figure_2_Supplement_2.pdf]

**A**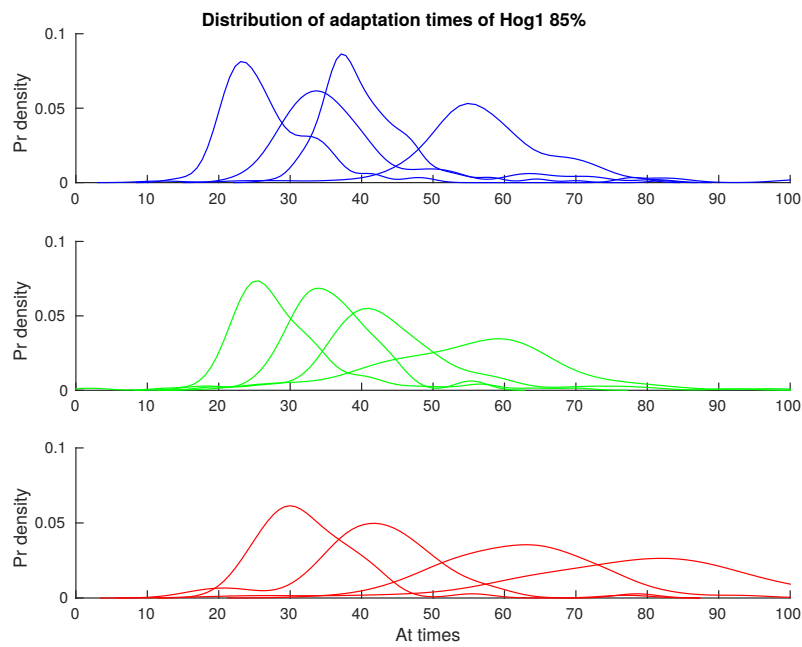

**Figure 2—supplement 2: Distributions of the adaptation time of Hog1 for different step inputs.** Single-cell distributions of the adaptation time of Hog1 (time to adapt to 85% of the maximum value) for step inputs of 0.6, 0.8, 1 and 1.2M sorbitol. Adaptation times were found from the experiments of Fig. 2—supplement 1 and the distributions used to calculate the mutual information in Fig. 2D.
