# Supplementary material for: Distributing tasks via multiple input pathways increases cellular survival in stress
Source: eLife journal article supplement (doi:10.7554/elife.21415), 2017-05-17
Supplement: supp [file elife_poa_e21415_Figure_3_Figure_Supplement1.pdf › elife_poa_e21415_Figure_3_Figure_Supplement1.pdf]

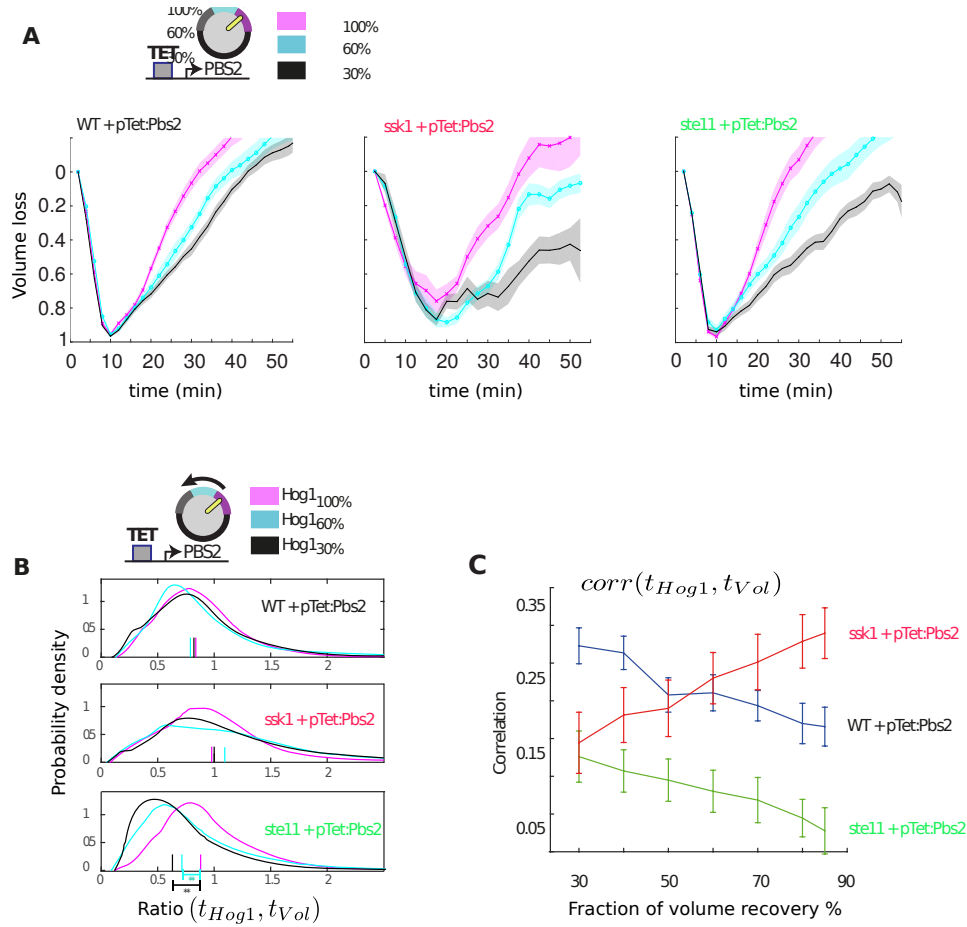

**Figure 3—supplement 1: Only the wild-type and slow mutant can compensate when Pbs2 levels are reduced by increasing the adaptation time of Hog1 .** **A** Average volume as a function of time in the three strains for different levels of Pbs2 repression. The time to recover the volume is extended in all strains for reduced levels of Pbs2. **B** Distributions of the ratio between the adaptation time of Hog1 and the adaptation time of the volume in single cells for different levels of Pbs2. Each distribution comprises at least 200 cells from 3 independent experiments (27 experiments in total). The median is indicated by a coloured line on the  $x$ -axis. For the fast mutant, reduced levels of Pbs2 result in premature adaptation of Hog1 relative to the volume recovery ( $p < 10^{-6}$ : two-sided Wilcoxon rank sum test for equal medians and indicated by asterisks). For wild-type and the slow mutant, the ratio of the time of adaptation of Hog1 adaptation to the time of adaptation of the volume is not significantly affected by reduced Pbs2 levels ( $p > 0.1$ ). **C** The correlation between adaptation time of Hog1 and the time for volume recovery as a percentage of volume recovery calculated by pooling together the data from **B** (cf. Fig. 2C).
