# Supplementary material for: Distributing tasks via multiple input pathways increases cellular survival in stress
Source: eLife journal article supplement (doi:10.7554/elife.21415), 2017-05-17
Supplement: supp [file elife_poa_e21415_Figure_4_Figure_Supplement_1.pdf › elife_poa_e21415_Figure_4_Figure_Supplement_1.pdf]

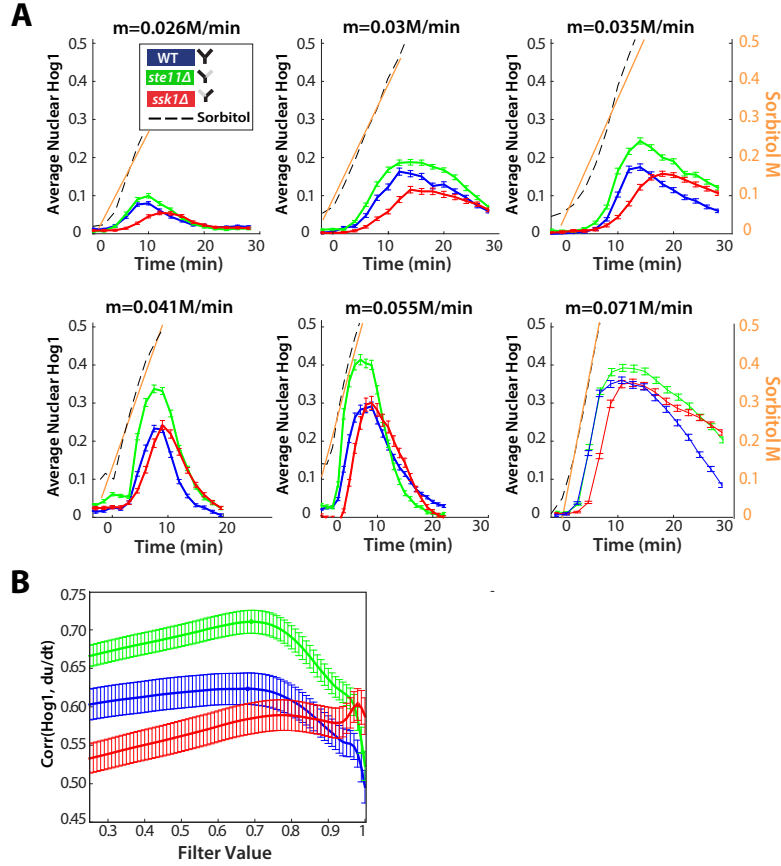

**Figure 4—supplement 1: The Hog1 response of the fast mutant in ramps of stress indicates derivative action.** **A** Ramp data from Fig. 2D showing the consistent overshoot of the wild-type Hog1 by the fast mutant. The sorbitol concentration was calculated from the fluorescent signal of the cy5 dye (black dotted lines and right y-axis) and a linear approximation is shown by the orange lines. Numbers of cells are listed in order of wild-type, *ste11Δ*, *ssk1Δ* for each experiment ( $n=201, 195, 192$  for  $0.026\text{M/min}$ ;  $n=112, 198, 97$  for  $0.03\text{M/min}$ ;  $n=193, 226, 200$  for  $0.035\text{M/min}$ ;  $n=175, 164, 144$  for  $0.041\text{M/min}$ ;  $n=134, 86, 60$  for  $0.055\text{M/min}$ ;  $n=148, 187, 186$  for  $0.071\text{M/min}$ ). **B** The cross-correlation between the single-cell trajectories of Hog1 and the time-derivative of the input in the fluctuating ramp of Fig. 4D. The derivative was smoothed using a first order filter and the correlation is plotted as a function of the smoothing parameter  $\alpha$ . Cross-correlation for 3 experiments were calculated in total and the average is shown in Fig. 4E.
