# Supplementary material for: Distributing tasks via multiple input pathways increases cellular survival in stress
Source: eLife journal article supplement (doi:10.7554/elife.21415), 2017-05-17
Supplement: supp [file elife_poa_e21415_Figure_5_Figure_Supplement_2.pdf › elife_poa_e21415_Figure_5_Figure_Supplement_2.pdf]

| Model parameters |            |                                |
|------------------|------------|--------------------------------|
| Parameter name   | Value      | Process                        |
| $k_{fast}$       | 3.808      | Fast pathway filter            |
| $\tau_{fast}$    | 0.1250 min | Fast pathway filter            |
| $k_{slow}$       | 3.26       | Slow pathway filter            |
| $\tau_{slow}$    | 0.633 min  | Slow pathway filter            |
| $Y_{deriv}$      | 0.2920     | Fast pathway derivative gain   |
| $k_{du}$         | 11.2572    | Fast pathway derivative filter |
| $\tau_{du}$      | 7.00 min   | Fast pathway derivative filter |
| $Y_{ind}$        | 7.07       | Independent pathway            |
| $Y_{int}$        | 5.12       | Integral gain                  |
| $k_{gly}$        | 0.0621     | Glycerol filter                |
| $\tau_{gly}$     | 3.52 min   | Glycerol filter                |
| $k_{-fast}$      | 1.11       | Pathways interaction           |
| $\tau_{-fast}$   | 0.33 min   | Pathways interaction           |
| $k_{-slow}$      | 0.2462     | Pathways interaction           |
| $\tau_{-slow}$   | 0.077 min  | Pathways interaction           |

**Figure 5—supplement 2: Table of parameters for the model.**
